# Supplementary material for: Effects of Bisphenol A on Oxidative Stress in the Rat Brain
Source: PubMed Central journal article supplement (PMC7139612; doi:10.3390/antiox9030240), 2020-03-16
Supplement: antioxidants-09-00240-s001.pdf [file antioxidants-09-00240-s001.pdf]

# Suppl. 1

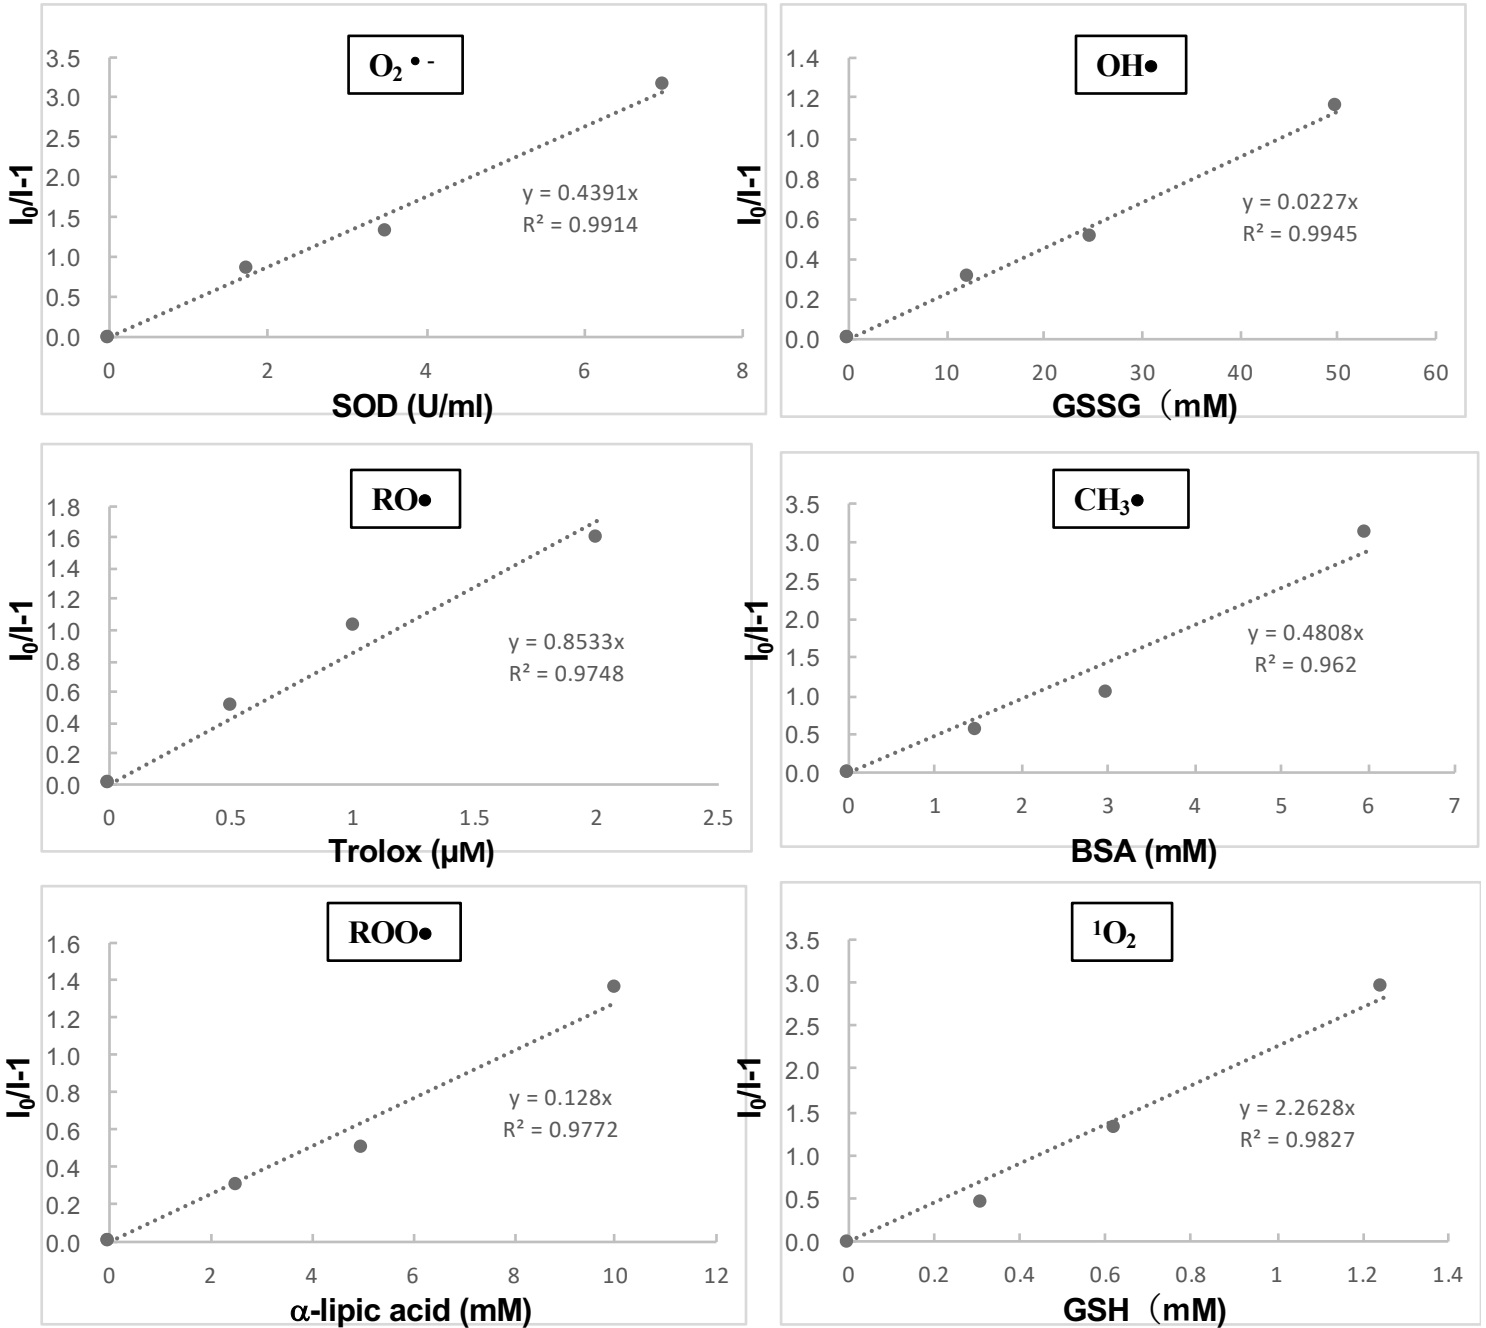

Suppl. 1 Standard of free radical scavenging activity on MULTIS method

## Suppl. 2

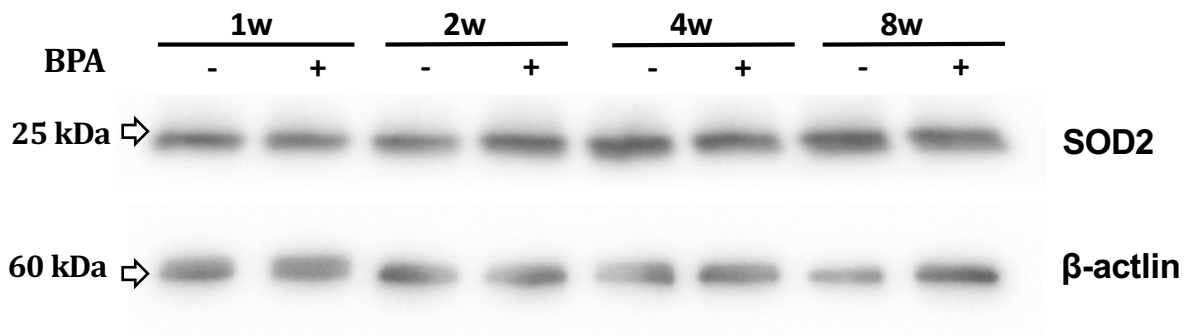

Suppl. 2 Representative figure of SOD2 levels of BPA treatment.
